# Supplementary material for: P2Y12 Inhibitor Monotherapy vs Dual Antiplatelet Therapy After Deployment of a Drug-Eluting Stent: The SHARE Randomized Clinical Trial
Source: PubMed Central journal article supplement — JAMA Netw Open. 2024 Mar 7;7(3):e240877. doi: 10.1001/jamanetworkopen.2024.0877 (PMC10921250; doi:10.1001/jamanetworkopen.2024.0877), 2024-03-07

## Supplemental Online Content

Min PK, Kang TS, Cho YH, et al. P2Y12 inhibitor monotherapy vs dual antiplatelet therapy after deployment of a drug-eluting stent: the SHARE randomized clinical trial. *JAMA Netw Open*. 2024;7(3):e240877.  
doi:10.1001/jamanetworkopen.2024.0877

**eTable 1.** Inclusion and Exclusion Criteria

**eTable 2.** Angiographic and Procedural Characteristics for Treated Lesions

**eTable 3.** Discharge Medication

**eTable 4.** Reasons for Nonadherence to the Allocated Treatment

**eTable 5.** Clinical Outcomes at 12 Months

**eTable 6.** Per-Protocol Analyses for Clinical Outcomes Between 3 and 12 Months

**eTable 7.** Per-Protocol Analyses for Clinical Outcomes at 12 Months

**eFigure 1.** Time-to-Event Curves for the Primary Outcomes in Per-Protocol Analysis

**eFigure 2.** Time-to-Event Curves for the Major Adverse Cardiac and Cerebrovascular Events

**eFigure 3.** Time-to-Event Curves for the Major Bleeding

**eFigure 4.** Subgroup Analyses for the Major Adverse Cardiac and Cerebrovascular Events

This supplemental material has been provided by the authors to give readers additional information about their work.

**eTable 1. Inclusion and Exclusion Criteria**

|                                                                                                                                                                                                                                                                                                                                                                                                                                                                                                                                                                                                                                                                                                                                                                                                                                                                                                                                                                                                                                                                                                                                                                                                                                                                                                                                                                                                       |
|-------------------------------------------------------------------------------------------------------------------------------------------------------------------------------------------------------------------------------------------------------------------------------------------------------------------------------------------------------------------------------------------------------------------------------------------------------------------------------------------------------------------------------------------------------------------------------------------------------------------------------------------------------------------------------------------------------------------------------------------------------------------------------------------------------------------------------------------------------------------------------------------------------------------------------------------------------------------------------------------------------------------------------------------------------------------------------------------------------------------------------------------------------------------------------------------------------------------------------------------------------------------------------------------------------------------------------------------------------------------------------------------------------|
| <b>Inclusion criteria</b>                                                                                                                                                                                                                                                                                                                                                                                                                                                                                                                                                                                                                                                                                                                                                                                                                                                                                                                                                                                                                                                                                                                                                                                                                                                                                                                                                                             |
| <ul style="list-style-type: none"><li>● Age <math>\geq</math> 19 years</li><li>● Patients who received bioresorbable polymer everolimus-eluting stent (the SYNERGY stent) implantation within 3 months</li><li>● Patients who can understand the contents of the informed consent document and have voluntarily signed the informed consent form</li></ul>                                                                                                                                                                                                                                                                                                                                                                                                                                                                                                                                                                                                                                                                                                                                                                                                                                                                                                                                                                                                                                            |
| <b>Exclusion criteria</b>                                                                                                                                                                                                                                                                                                                                                                                                                                                                                                                                                                                                                                                                                                                                                                                                                                                                                                                                                                                                                                                                                                                                                                                                                                                                                                                                                                             |
| <ul style="list-style-type: none"><li>● Age <math>\geq</math> 86 years</li><li>● Hemodynamically unstable patients</li><li>● History of severe hypersensitivity to aspirin, clopidogrel, ticagrelor, everolimus, or contrast media</li><li>● Patients at high risk of bleeding, anemia, or thrombocytopenia</li><li>● Patients requiring oral anticoagulation</li><li>● Pregnancy or women of childbearing potential</li><li>● Life expectancy less than 1 year</li><li>● Patients receiving strong CYP3A4 inhibitors (e.g., ketoconazole, clarithromycin, nefazodone, ritonavir, atazanavir)</li><li>● Patients with a history of intracranial hemorrhage.</li><li>● Patients with moderate to severe hepatic impairment.</li><li>● Patients unable to take aspirin, clopidogrel, or ticagrelor due to contraindications of each agent</li></ul> <b>Coronary angiographic exclusion criteria</b> <ul style="list-style-type: none"><li>● Patients who have undergone coronary stent implantation within 1 year</li><li>● Patients with left main disease requiring intervention</li><li>● Patients with chronic total occlusion lesion requiring intervention</li><li>● Patients with in-stent restenosis requiring intervention</li><li>● Patients with bifurcation lesions requiring stenting in the side branches</li><li>● Patients with lesions requiring overlap of 3 or more stents</li></ul> |

**eTable 2.** Angiographic and Procedural Characteristics for Treated Lesions

| Characteristics                          | P2Y12i<br>(N = 873) | DAPT<br>(N = 873) |
|------------------------------------------|---------------------|-------------------|
| Targeted artery                          |                     |                   |
| LAD                                      | 451 (51.7)          | 431 (49.4)        |
| LCx                                      | 160 (18.3)          | 184 (21.1)        |
| RCA                                      | 262 (30.0)          | 258 (29.6)        |
| Pre-PCI QCA                              |                     |                   |
| Reference vessel diameter, mean (SD), mm | 3.0 (0.6)           | 3.0 (0.5)         |
| Minimal lumen diameter, mean (SD), mm    | 0.5 (0.4)           | 0.5 (0.4)         |
| Diameter stenosis, mean (SD), %          | 82.7 (14.2)         | 82.6 (14.6)       |
| Lesion length, mean (SD), mm             | 24.1 (11.2)         | 23.3 (10.1)       |
| Post-PCI QCA                             |                     |                   |
| Reference vessel diameter, mean (SD), mm | 3.1 (0.6)           | 3.1 (0.8)         |
| Minimal lumen diameter, mean (SD), mm    | 3.0 (0.9)           | 3.0 (0.8)         |
| Diameter stenosis, mean (SD), %          | 5.5 (26.1)          | 6.3 (9.0)         |

Values are presented as No. (%) unless otherwise indicated.

DAPT = dual antiplatelet therapy; LAD = left anterior descending artery; LCx = left circumflex artery; RCA = right coronary artery; P2Y12i = P2Y12 inhibitor monotherapy; PCI = percutaneous coronary intervention; QCA = quantitative coronary angiography.

**eTable 3. Discharge Medication**

| <b>Medication</b> | <b>P2Y12i<br/>(N=694)</b> | <b>DAPT<br/>(N=693)</b> |
|-------------------|---------------------------|-------------------------|
| P2Y12 inhibitor   |                           |                         |
| Clopidogrel       | 427 (61.5)                | 440 (63.5)              |
| Ticagrelor        | 267 (38.5)                | 253 (36.5)              |
| ACE inhibitor     | 158 (22.8)                | 141 (20.3)              |
| ARB               | 282 (40.6)                | 283 (40.8)              |
| Beta blocker      | 364 (52.4)                | 365 (52.7)              |
| CCB               | 153 (22.0)                | 195 (28.1)              |
| Statin            | 654 (94.2)                | 657 (94.8)              |

Values are presented as No. (%).

ACE = angiotensin converting enzyme; ARB = angiotensin receptor blocker; CCB = calcium channel blocker; DAPT = dual antiplatelet therapy; P2Y12i = P2Y12 inhibitor monotherapy.

**eTable 4.** Reasons for Nonadherence to the Allocated Treatment

| Reasons                                            | P2Y12i     | DAPT      |
|----------------------------------------------------|------------|-----------|
| <b>No. of patients</b>                             | 138        | 17        |
| Gastrointestinal problem                           | 2 ( 1.4)   | 1 ( 5.9)  |
| Easy bruise                                        | 0 ( 0.0)   | 1 ( 5.9)  |
| Bleeding episode                                   | 0 ( 0.0)   | 1 ( 5.9)  |
| Additional PCI                                     | 1 ( 0.7)   | 0 ( 0.0)  |
| Physicians' discretion considering patients' risks | 132 (95.7) | 11 (64.7) |
| Need of anticoagulation                            | 3 ( 2.2)   | 3 (17.6)  |

Values are presented as No. (%).

DAPT = dual antiplatelet therapy; P2Y12i = P2Y12 inhibitor monotherapy; PCI = percutaneous coronary intervention.

**eTable 5. Clinical Outcomes at 12 Months**

| Outcome                                 | P2Y12i<br>(N = 694) <sup>a</sup> | DAPT<br>(N = 693) <sup>a</sup> | Absolute<br>difference,%<br>(95% CI) | P value                  |
|-----------------------------------------|----------------------------------|--------------------------------|--------------------------------------|--------------------------|
| <b>Primary outcome</b>                  |                                  |                                |                                      |                          |
| Net adverse clinical event <sup>b</sup> | 11 (2.0)                         | 21 (3.3)                       | -1.36 (-3.2, 0.49)                   | <0.001 (non-inferiority) |
| <b>Secondary outcomes</b>               |                                  |                                |                                      |                          |
| Death                                   | 7 (1.0)                          | 6 (0.9)                        | 0.14 (-0.9, 1.17)                    | 0.80                     |
| Cardiac                                 | 1 (0.2)                          | 3 (0.4)                        | -0.29 (-0.86, 0.29)                  | 0.33                     |
| Non-cardiac                             | 6 (0.9)                          | 3 (0.5)                        | 0.42 (-0.45, 1.29)                   | 0.34                     |
| Myocardial infarction                   | 2 (0.4)                          | 3 (0.5)                        | -0.12 (-0.87, 0.64)                  | 0.76                     |
| Stent thrombosis                        | 1 (0.2)                          | 2 (0.3)                        | -0.12 (-0.76, 0.52)                  | 0.72                     |
| Stroke                                  | 3 (0.5)                          | 2 (0.3)                        | 0.16 (-0.5, 0.82)                    | 0.64                     |
| Ischemic                                | 2 (0.3)                          | 2 (0.3)                        | 0.01 (-0.59, 0.6)                    | 0.99                     |
| Hemorrhagic                             | 1 (0.2)                          | 0 (0)                          | 0.15 (-0.15, 0.46)                   | 0.32                     |
| Any revascularization                   | 22 (4.2)                         | 28 (5)                         | -0.84 (-3.38, 1.7)                   | 0.52                     |
| TLR                                     | 6 (1.2)                          | 7 (1.2)                        | 0.02 (-1.33, 1.36)                   | 0.98                     |
| TVR                                     | 10 (1.9)                         | 12 (2.2)                       | -0.27 (-2.02, 1.48)                  | 0.76                     |
| Other vessel PCI                        | 12 (2.3)                         | 16 (2.9)                       | -0.59 (-2.51, 1.33)                  | 0.55                     |
| Major bleeding <sup>c</sup>             | 1 (0.2)                          | 6 (0.9)                        | -0.75 (-1.52, 0.03)                  | 0.06                     |
| MACCE <sup>d</sup>                      | 10 (1.8)                         | 16 (2.6)                       | -0.77 (-2.49, 0.94)                  | 0.38                     |

Values are presented as No. (%) unless otherwise indicated.

<sup>a</sup>The percentages are Kaplan-Meier estimates. <sup>b</sup>A composite of MACCE or major bleeding. <sup>c</sup>Bleeding Academic Research Consortium type 3 or 5 bleeding. <sup>d</sup>A composite of cardiac death, myocardial infarction, stent thrombosis, stroke, or target lesion revascularization.

DAPT = dual antiplatelet therapy; MACCE = major adverse cardiac and cerebrovascular event; P2Y12i = P2Y12 inhibitor monotherapy; PCI = percutaneous coronary intervention; TLR = target lesion revascularization; TVR = target vessel revascularization.

**eTable 6.** Per-Protocol Analyses for Clinical Outcomes Between 3 and 12 Months

| <b>Outcome</b>                          | <b>P2Y12i<br/>(N = 556)<sup>a</sup></b> | <b>DAPT<br/>(N = 676)<sup>a</sup></b> | <b>Absolute<br/>difference,%<br/>(95% CI)</b> | <b>P value</b>           |
|-----------------------------------------|-----------------------------------------|---------------------------------------|-----------------------------------------------|--------------------------|
| Net adverse clinical event <sup>b</sup> | 6 (1.4)                                 | 15 (2.5)                              | -1.1 (-2.81,0.62)                             | <0.001 (non-inferiority) |
| MACCE <sup>c</sup>                      | 6 (1.4)                                 | 11 (1.9)                              | -0.49 (-2.11,1.12)                            | 0.55                     |
| Major bleeding <sup>d</sup>             | 0 (0)                                   | 4 (0.6)                               | -0.62 (-1.22,-0.01)                           | 0.05                     |

Values are presented as No. (%) unless otherwise indicated.

<sup>a</sup>The percentages are Kaplan-Meier estimates. <sup>b</sup>A composite of MACCE or major bleeding. <sup>c</sup>A composite of cardiac death, myocardial infarction, stent thrombosis, stroke, or target lesion revascularization. <sup>d</sup>Bleeding Academic Research Consortium type 3 or 5 bleeding.

DAPT = dual antiplatelet therapy; MACCE = major adverse cardiac and cerebrovascular event; P2Y12i = P2Y12 inhibitor monotherapy.

**eTable 7.** Per-Protocol Analyses for Clinical Outcomes at 12 Months

| <b>Outcome</b>                          | <b>P2Y12i<br/>(N = 556)<sup>a</sup></b> | <b>DAPT<br/>(N = 676)<sup>a</sup></b> | <b>Absolute<br/>difference,%<br/>(95% CI)</b> | <b>P value</b>           |
|-----------------------------------------|-----------------------------------------|---------------------------------------|-----------------------------------------------|--------------------------|
| Net adverse clinical event <sup>b</sup> | 6 (1.4)                                 | 19 (3.1)                              | -1.68 (-3.48,0.12)                            | <0.001 (non-inferiority) |
| MACCE <sup>c</sup>                      | 6 (1.4)                                 | 15 (2.5)                              | -1.08 (-2.78,0.63)                            | 0.22                     |
| Major bleeding <sup>d</sup>             | 0 (0)                                   | 4 (0.6)                               | -0.62 (-1.22,-0.01)                           | 0.05                     |

Values are presented as No. (%) unless otherwise indicated.

<sup>a</sup>The percentages are Kaplan-Meier estimates. <sup>b</sup>A composite of MACCE or major bleeding. <sup>c</sup>A composite of cardiac death, myocardial infarction, stent thrombosis, stroke, or target lesion revascularization. <sup>d</sup>Bleeding Academic Research Consortium type 3 or 5 bleeding.

DAPT = dual antiplatelet therapy; MACCE = major adverse cardiac and cerebrovascular event; P2Y12i = P2Y12 inhibitor monotherapy.



**eFigure 1. Time-to-Event Curves for the Primary Outcomes in Per-Protocol Analysis**

(A) Landmark analysis at 3 months for the net adverse clinical event. (B) One-year primary outcome of the net adverse clinical event. Net adverse clinical events was defined as a composite of major bleeding (Bleeding Academic Research Consortium 3 or 5 bleeding) or major adverse cardiac and cerebrovascular event. Event rates were based on Kaplan–Meier estimates in time-to-first-event analyses. DAPT = dual antiplatelet therapy; P2Y12i = P2Y12 inhibitor monotherapy.

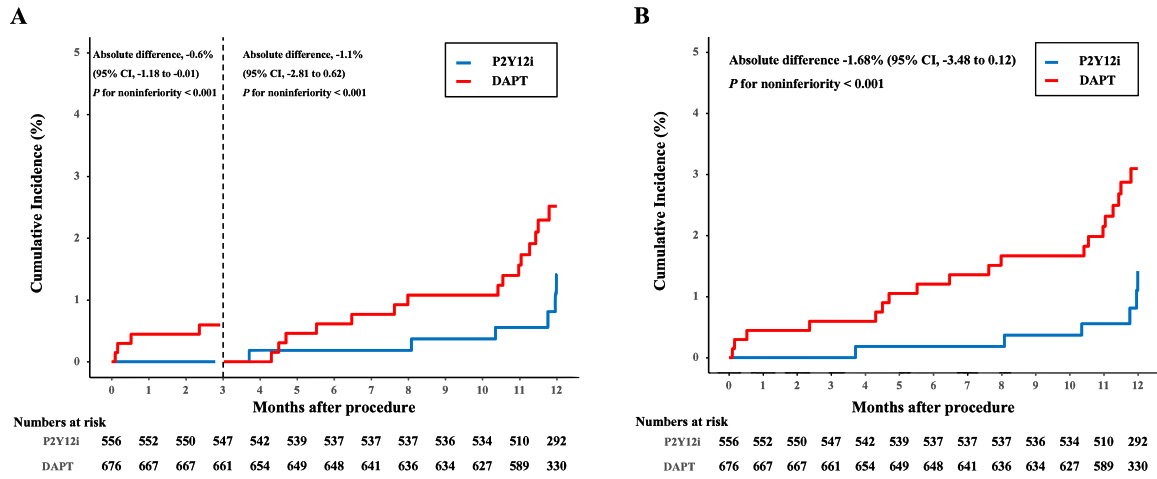

## eFigure 2. Time-to-Event Curves for the Major Adverse Cardiac and Cerebrovascular Events

(A) Landmark analysis at 3 months for the major adverse cardiac and cerebrovascular events. (B) One-year primary outcome of the major adverse cardiac and cerebrovascular events. A major adverse cardiac and cerebrovascular event was defined as a composite of cardiac death, myocardial infarction, stent thrombosis, stroke, or target lesion revascularization. Event rates were based on Kaplan–Meier estimates in time-to-first-event analyses. DAPT = dual antiplatelet therapy; P2Y12i = P2Y12 inhibitor monotherapy.

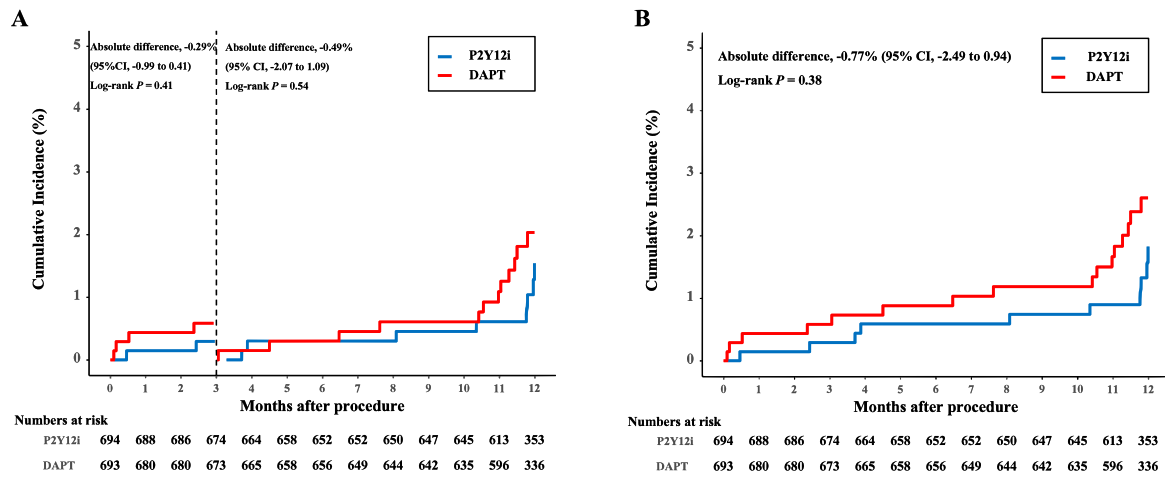

### eFigure 3. Time-to-Event Curves for the Major Bleeding

(A) Landmark analysis at 3 months for the major bleeding. (B) One-year primary outcome of the major bleeding. A major bleeding was defined as Bleeding Academic Research Consortium 3 or 5 bleeding. Event rates were based on Kaplan–Meier estimates in time-to-first-event analyses. DAPT = dual antiplatelet therapy; P2Y12i = P2Y12 inhibitor monotherapy.

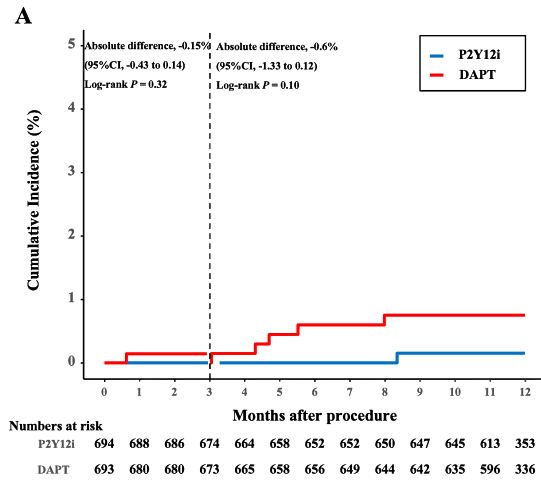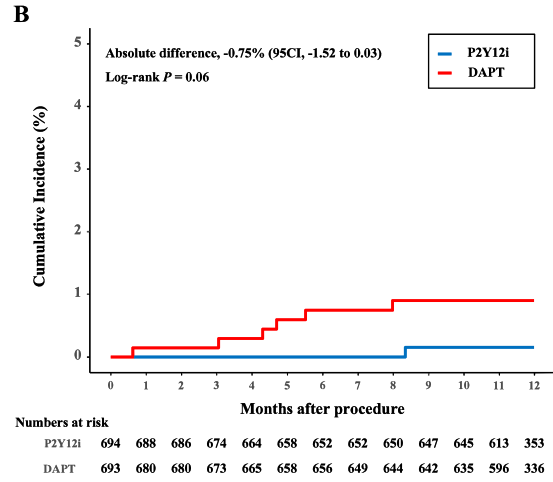

## eFigure 4. Subgroup Analyses for the Major Adverse Cardiac and Cerebrovascular Events

Numbers and percentages shown are number of patients with event/number of patients at risk and incidences between 3 and 12 months after the index procedure.

ACS = acute coronary syndrome; BMI = body mass index; CAD = coronary artery disease; CCS = chronic coronary syndrome; DAPT = dual antiplatelet therapy; DM = diabetes mellitus; HR = hazard ratio; LV = left ventricle; P2Y12i = P2Y12 inhibitor monotherapy.

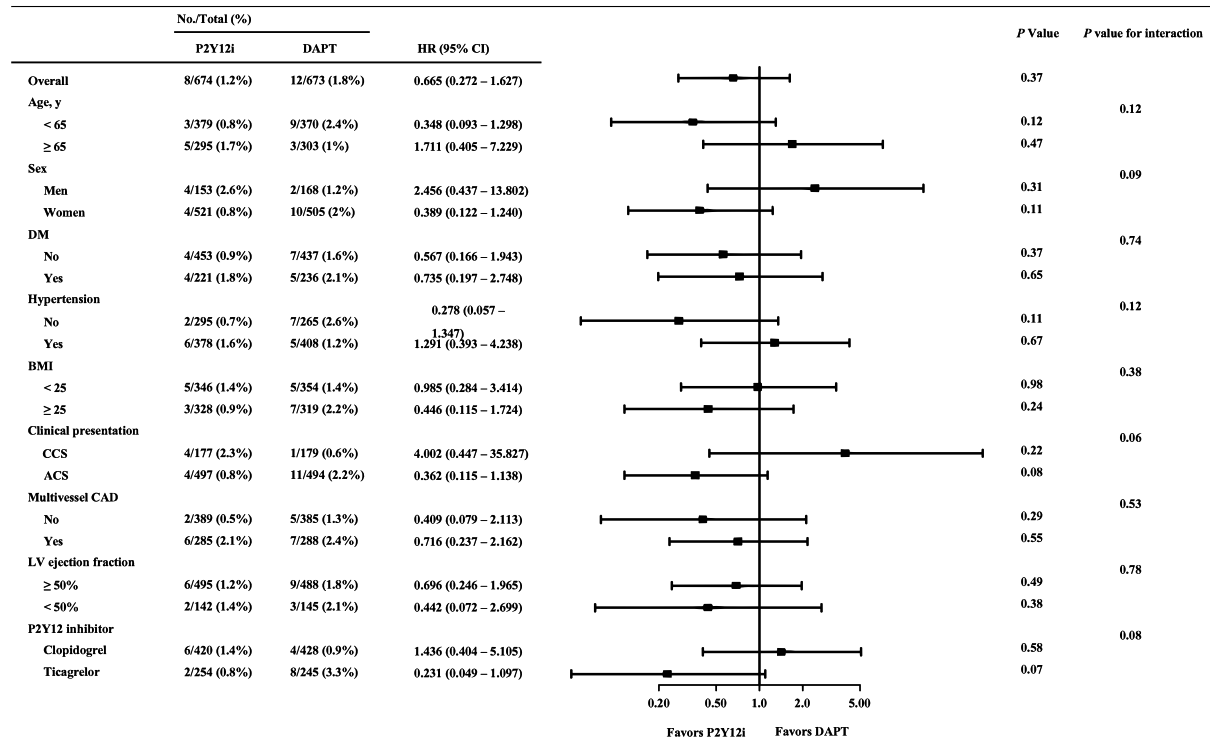

Supplement: jamanetwopen-e240877-s002.pdf [file jamanetwopen-e240877-s002.pdf]
