# Supplementary material for: P2Y12 Inhibitor Monotherapy vs Dual Antiplatelet Therapy After Deployment of a Drug-Eluting Stent: The SHARE Randomized Clinical Trial
Source: PubMed Central journal article supplement — JAMA Netw Open. 2024 Mar 7;7(3):e240877. doi: 10.1001/jamanetworkopen.2024.0877 (PMC10921250; doi:10.1001/jamanetworkopen.2024.0877), 2024-03-07
Supplement: jamanetwopen-e240877-s003.pdf [file jamanetwopen-e240877-s003.pdf]

Supplemental Online Content: Nonauthor Collaborators. The SHARE Investigators.  
 \*First name, last name, and suffix (if applicable) are required and will appear in PubMed.

| <b>*Group Name(s): The SHARE Investigators</b> |                   |                              |                         |                                                 |                                                 |                                                                                                                                                                                                                                          |                                                                                                   |  |  |  |
|------------------------------------------------|-------------------|------------------------------|-------------------------|-------------------------------------------------|-------------------------------------------------|------------------------------------------------------------------------------------------------------------------------------------------------------------------------------------------------------------------------------------------|---------------------------------------------------------------------------------------------------|--|--|--|
| <b>*First Name and Middle Initial(s)</b>       | <b>*Last Name</b> | <b>*Suffix (eg, Jr, III)</b> | <b>Academic Degrees</b> | <b>Institution</b>                              | <b>Location (city, state/province, country)</b> | <b>Role or Contribution, eg, chair, principal investigator</b>                                                                                                                                                                           | <b>Group (if more than 1 Group listed in the byline) and/or Subgroup (eg, Steering Committee)</b> |  |  |  |
| Bum-Kee                                        | Hong              |                              | MD                      | Gangnam Severance Hospital                      | Seoul, Korea                                    | Principal Investigator, Concept and design, Data Acquisition, Drafting of the manuscript, Critical review of the manuscript, Statistical analysis, Obtained funding, Administrative support, Supervision, and Enrollment of participants |                                                                                                   |  |  |  |
| Pil-Ki                                         | Min               |                              | MD                      | Gangnam Severance Hospital                      | Seoul, Korea                                    | 1st Author, Concept and design, Data Acquisition, Drafting of the manuscript, Critical review of the manuscript, Statistical analysis, Administrative support, Supervision, and Enrollment of participants                               |                                                                                                   |  |  |  |
| Tae Soo                                        | Kang              |                              | MD                      | Dankook University Hospital                     | Cheonan, Korea                                  | Concept and design, Data Acquisition, Drafting of the manuscript, Critical review of the manuscript, Statistical analysis, Administrative support, and Enrollment of participants                                                        |                                                                                                   |  |  |  |
| Yun-Hyeong                                     | Cho               |                              | MD                      | Myongji Hospital                                | Goyang, Korea                                   | Concept and design, Data Acquisition, Drafting of the manuscript, Critical review of the manuscript, Statistical analysis, Administrative support, Supervision, and Enrollment of participants                                           |                                                                                                   |  |  |  |
| Sang-Sig                                       | Cheong            |                              | MD                      | Gangneung Asan Hospital                         | Gangneung, Korea                                | Data Acquisition, Critical review of the manuscript, Administrative support, and Enrollment of participants                                                                                                                              |                                                                                                   |  |  |  |
| Byeong-Keuk                                    | Kim               |                              | MD                      | Severance Cardiovascular Hospital               | Seoul, Korea                                    | Data Acquisition, Critical review of the manuscript, Administrative support, Supervision, and Enrollment of participants                                                                                                                 |                                                                                                   |  |  |  |
| Sung Woo                                       | Kwon              |                              | MD                      | Inha University Hospital                        | Incheon, Korea                                  | Data Acquisition, Critical review of the manuscript, Administrative support, and Enrollment of participants                                                                                                                              |                                                                                                   |  |  |  |
| Woo Jung                                       | Park              |                              | MD                      | Hallym University Sacred Heart Hospital         | Anyang, Korea                                   | Data Acquisition, Critical review of the manuscript, Administrative support, Supervision, and Enrollment of participants                                                                                                                 |                                                                                                   |  |  |  |
| Jung-Hee                                       | Lee               |                              | MD                      | Yeungnam University Medical Center              | Daegu, Korea                                    | Data Acquisition, Critical review of the manuscript, Statistical analysis, Administrative support, and Enrollment of participants                                                                                                        |                                                                                                   |  |  |  |
| Wonho                                          | Kim               |                              | MD                      | Daejeon Eulji Medical Center                    | Daejeon, Korea                                  | Data Acquisition, Critical review of the manuscript, Administrative support, and Enrollment of participants                                                                                                                              |                                                                                                   |  |  |  |
| Wang-Soo                                       | Lee               |                              | MD                      | Chung-Ang University Hospital                   | Seoul, Korea                                    | Data Acquisition, Critical review of the manuscript, Administrative support, Supervision, and Enrollment of participants                                                                                                                 |                                                                                                   |  |  |  |
| Young Won                                      | Yoon              |                              | MD                      | Gangnam Severance Hospital                      | Seoul, Korea                                    | Concept and design, Data Acquisition, Drafting of the manuscript, Critical review of the manuscript, Statistical analysis, Administrative support, and Enrollment of participants                                                        |                                                                                                   |  |  |  |
| Byoung Kwon                                    | Lee               |                              | MD                      | Gangnam Severance Hospital                      | Seoul, Korea                                    | Concept and design, Data Acquisition, Drafting of the manuscript, Critical review of the manuscript, Statistical analysis, Administrative support, and Enrollment of participants                                                        |                                                                                                   |  |  |  |
| Hyuck Moon                                     | Kwon              |                              | MD                      | Gangnam Severance Hospital                      | Seoul, Korea                                    | Concept and design, Data Acquisition, Drafting of the manuscript, Critical review of the manuscript, Statistical analysis, Administrative support, Supervision, and Enrollment of participants                                           |                                                                                                   |  |  |  |
| Jin-Ok                                         | Jeong             |                              | MD                      | Chungnam National University Hospital           | Daejeon, Korea                                  | Enrollment of participants                                                                                                                                                                                                               |                                                                                                   |  |  |  |
| Byung Jin                                      | Kim               |                              | MD                      | Kangbuk Samsung Hospital                        | Seoul, Korea                                    | Enrollment of participants                                                                                                                                                                                                               |                                                                                                   |  |  |  |
| Sang-Ho                                        | Park              |                              | MD                      | Soon Chun Hyang University Cheonan Hospital     | Cheonan, Korea                                  | Enrollment of participants                                                                                                                                                                                                               |                                                                                                   |  |  |  |
| Seung Hwan                                     | Lee               |                              | MD                      | Yonsei University Wonju Christian Hospital      | Wonju, Korea                                    | Enrollment of participants                                                                                                                                                                                                               |                                                                                                   |  |  |  |
| Namho                                          | Lee               |                              | MD                      | Hallym University Kangnam Sacred Heart Hospital | Seoul, Korea                                    | Enrollment of participants                                                                                                                                                                                                               |                                                                                                   |  |  |  |
| Ae-Young                                       | Her               |                              | MD                      | Kangwon National University School of Medicine  | Chuncheon, Korea                                | Enrollment of participants                                                                                                                                                                                                               |                                                                                                   |  |  |  |
| Jinman                                         | Cho               |                              | MD                      | Kyung Hee University Hospital at Gangdong       | Seoul, Korea                                    | Enrollment of participants                                                                                                                                                                                                               |                                                                                                   |  |  |  |
| Jun Hee                                        | Lee               |                              | MD                      | Kangdong Sacred Heart Hospital                  | Seoul, Korea                                    | Enrollment of participants                                                                                                                                                                                                               |                                                                                                   |  |  |  |
| Jin Yong                                       | Hwang             |                              | MD                      | Gyeongsang National University Hospital         | Jinju, Korea                                    | Enrollment of participants                                                                                                                                                                                                               |                                                                                                   |  |  |  |
| Sung Uk                                        | Kwon              |                              | MD                      | Ilsan Paik Hospital                             | Goyang, Korea                                   | Enrollment of participants                                                                                                                                                                                                               |                                                                                                   |  |  |  |
